# Supplementary material for: Activity of methylene blue against the asexual ring stages of artemisinin-resistant Plasmodium falciparum
Source: Research Square preprint supplement (doi:10.21203/rs.3.rs-8558391/v1), 2026-01-23
Supplement: Supplementary file 1 [file 6520968d268945dd005778a8.docx]

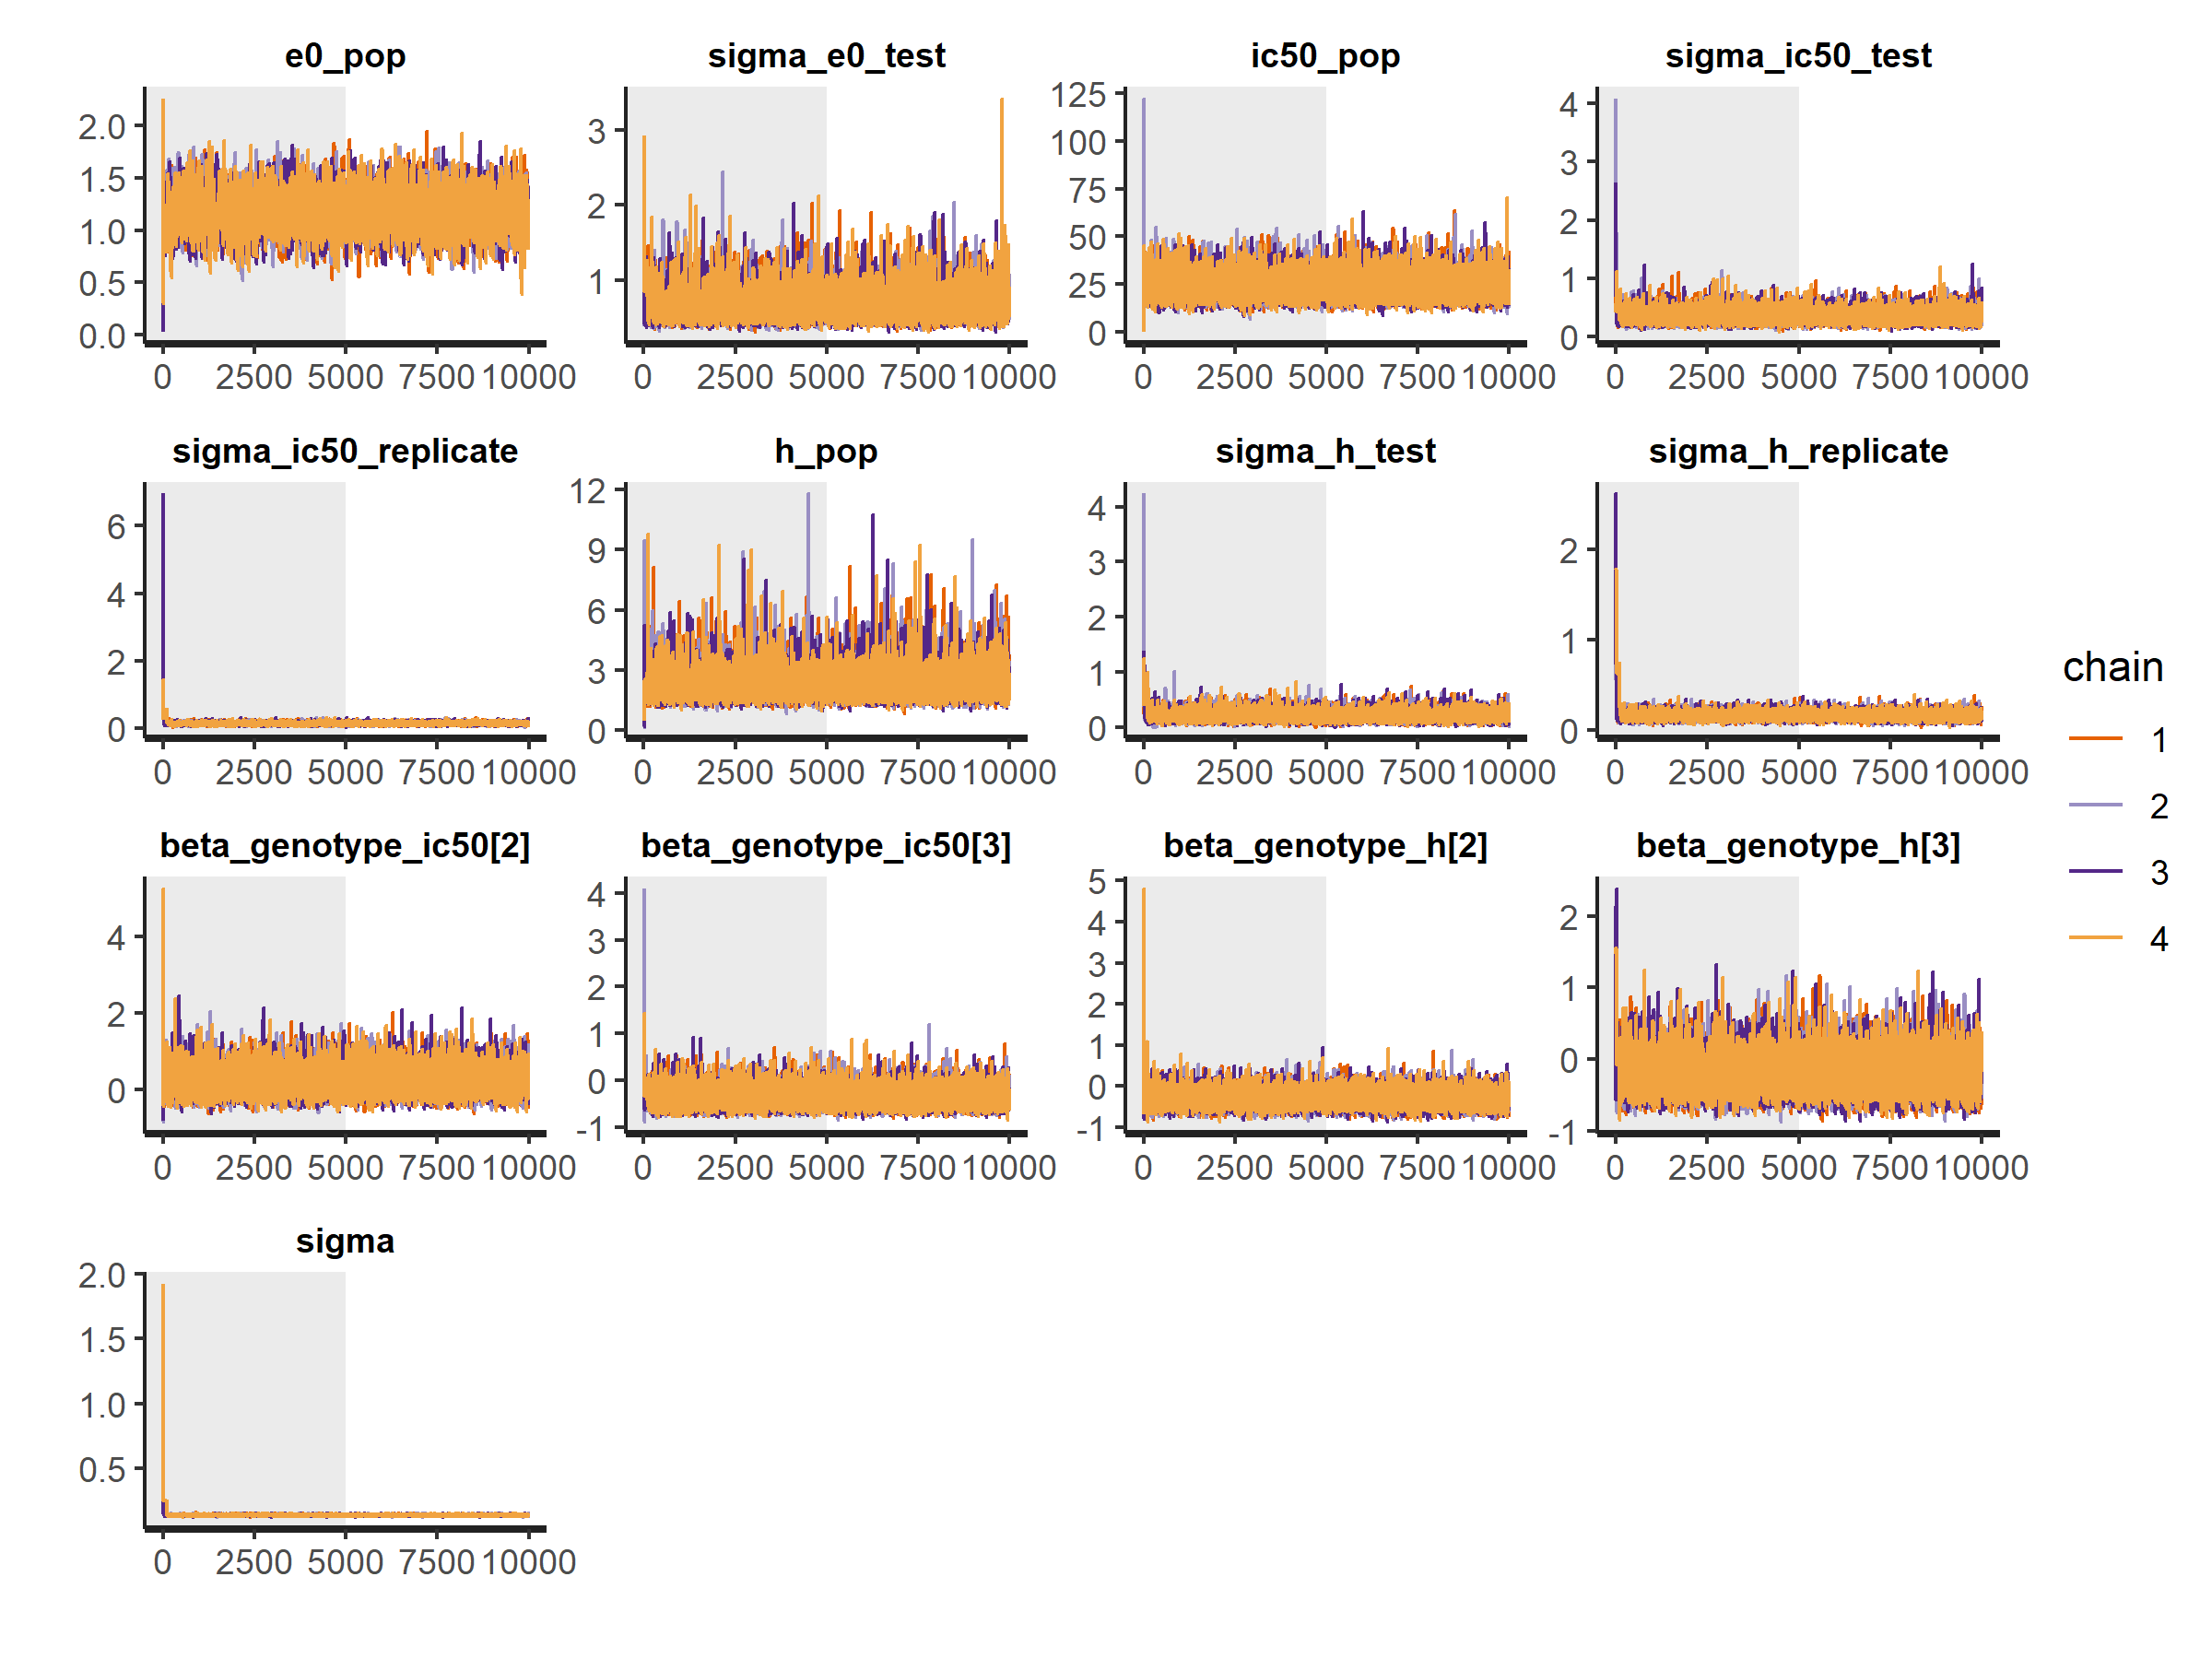


**Figure S1. Traceplot of MCMC chains showing mixing and convergence for the Bayesian multilevel model fitted to clinical isolate data.**


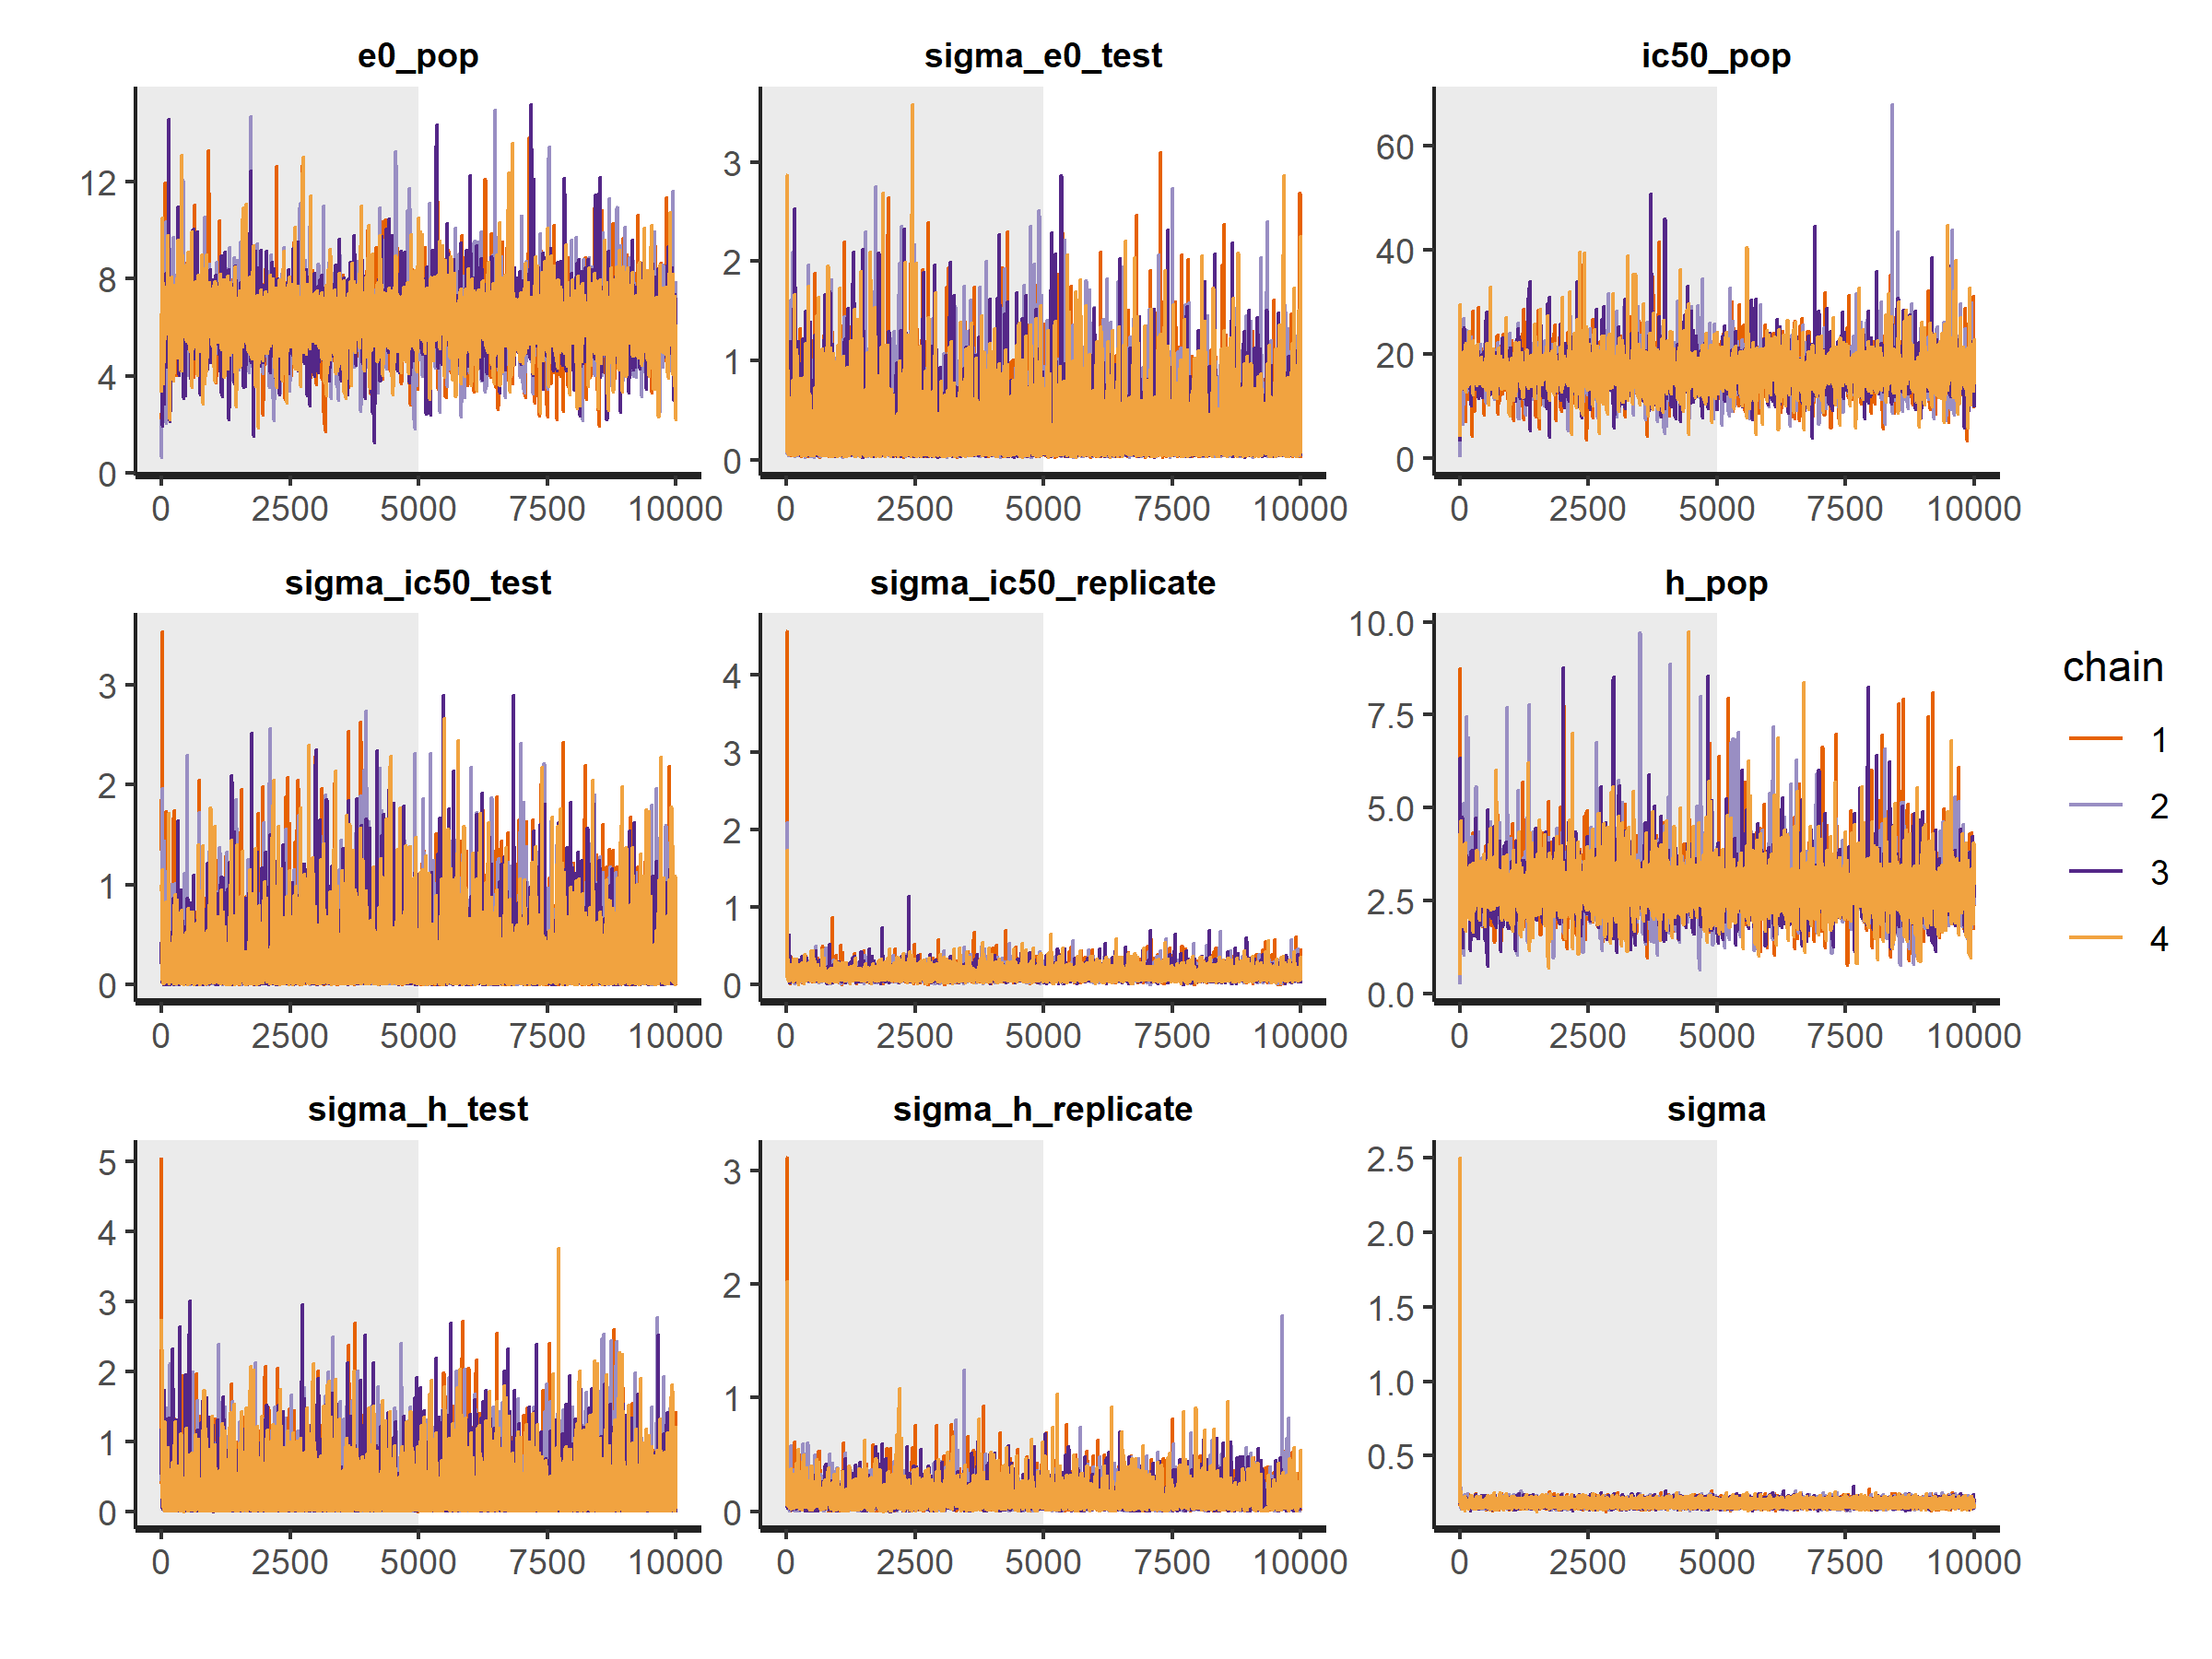


**Figure S2. Traceplot of MCMC chains showing mixing and convergence for the Bayesian multilevel model fitted to NF54 data.**


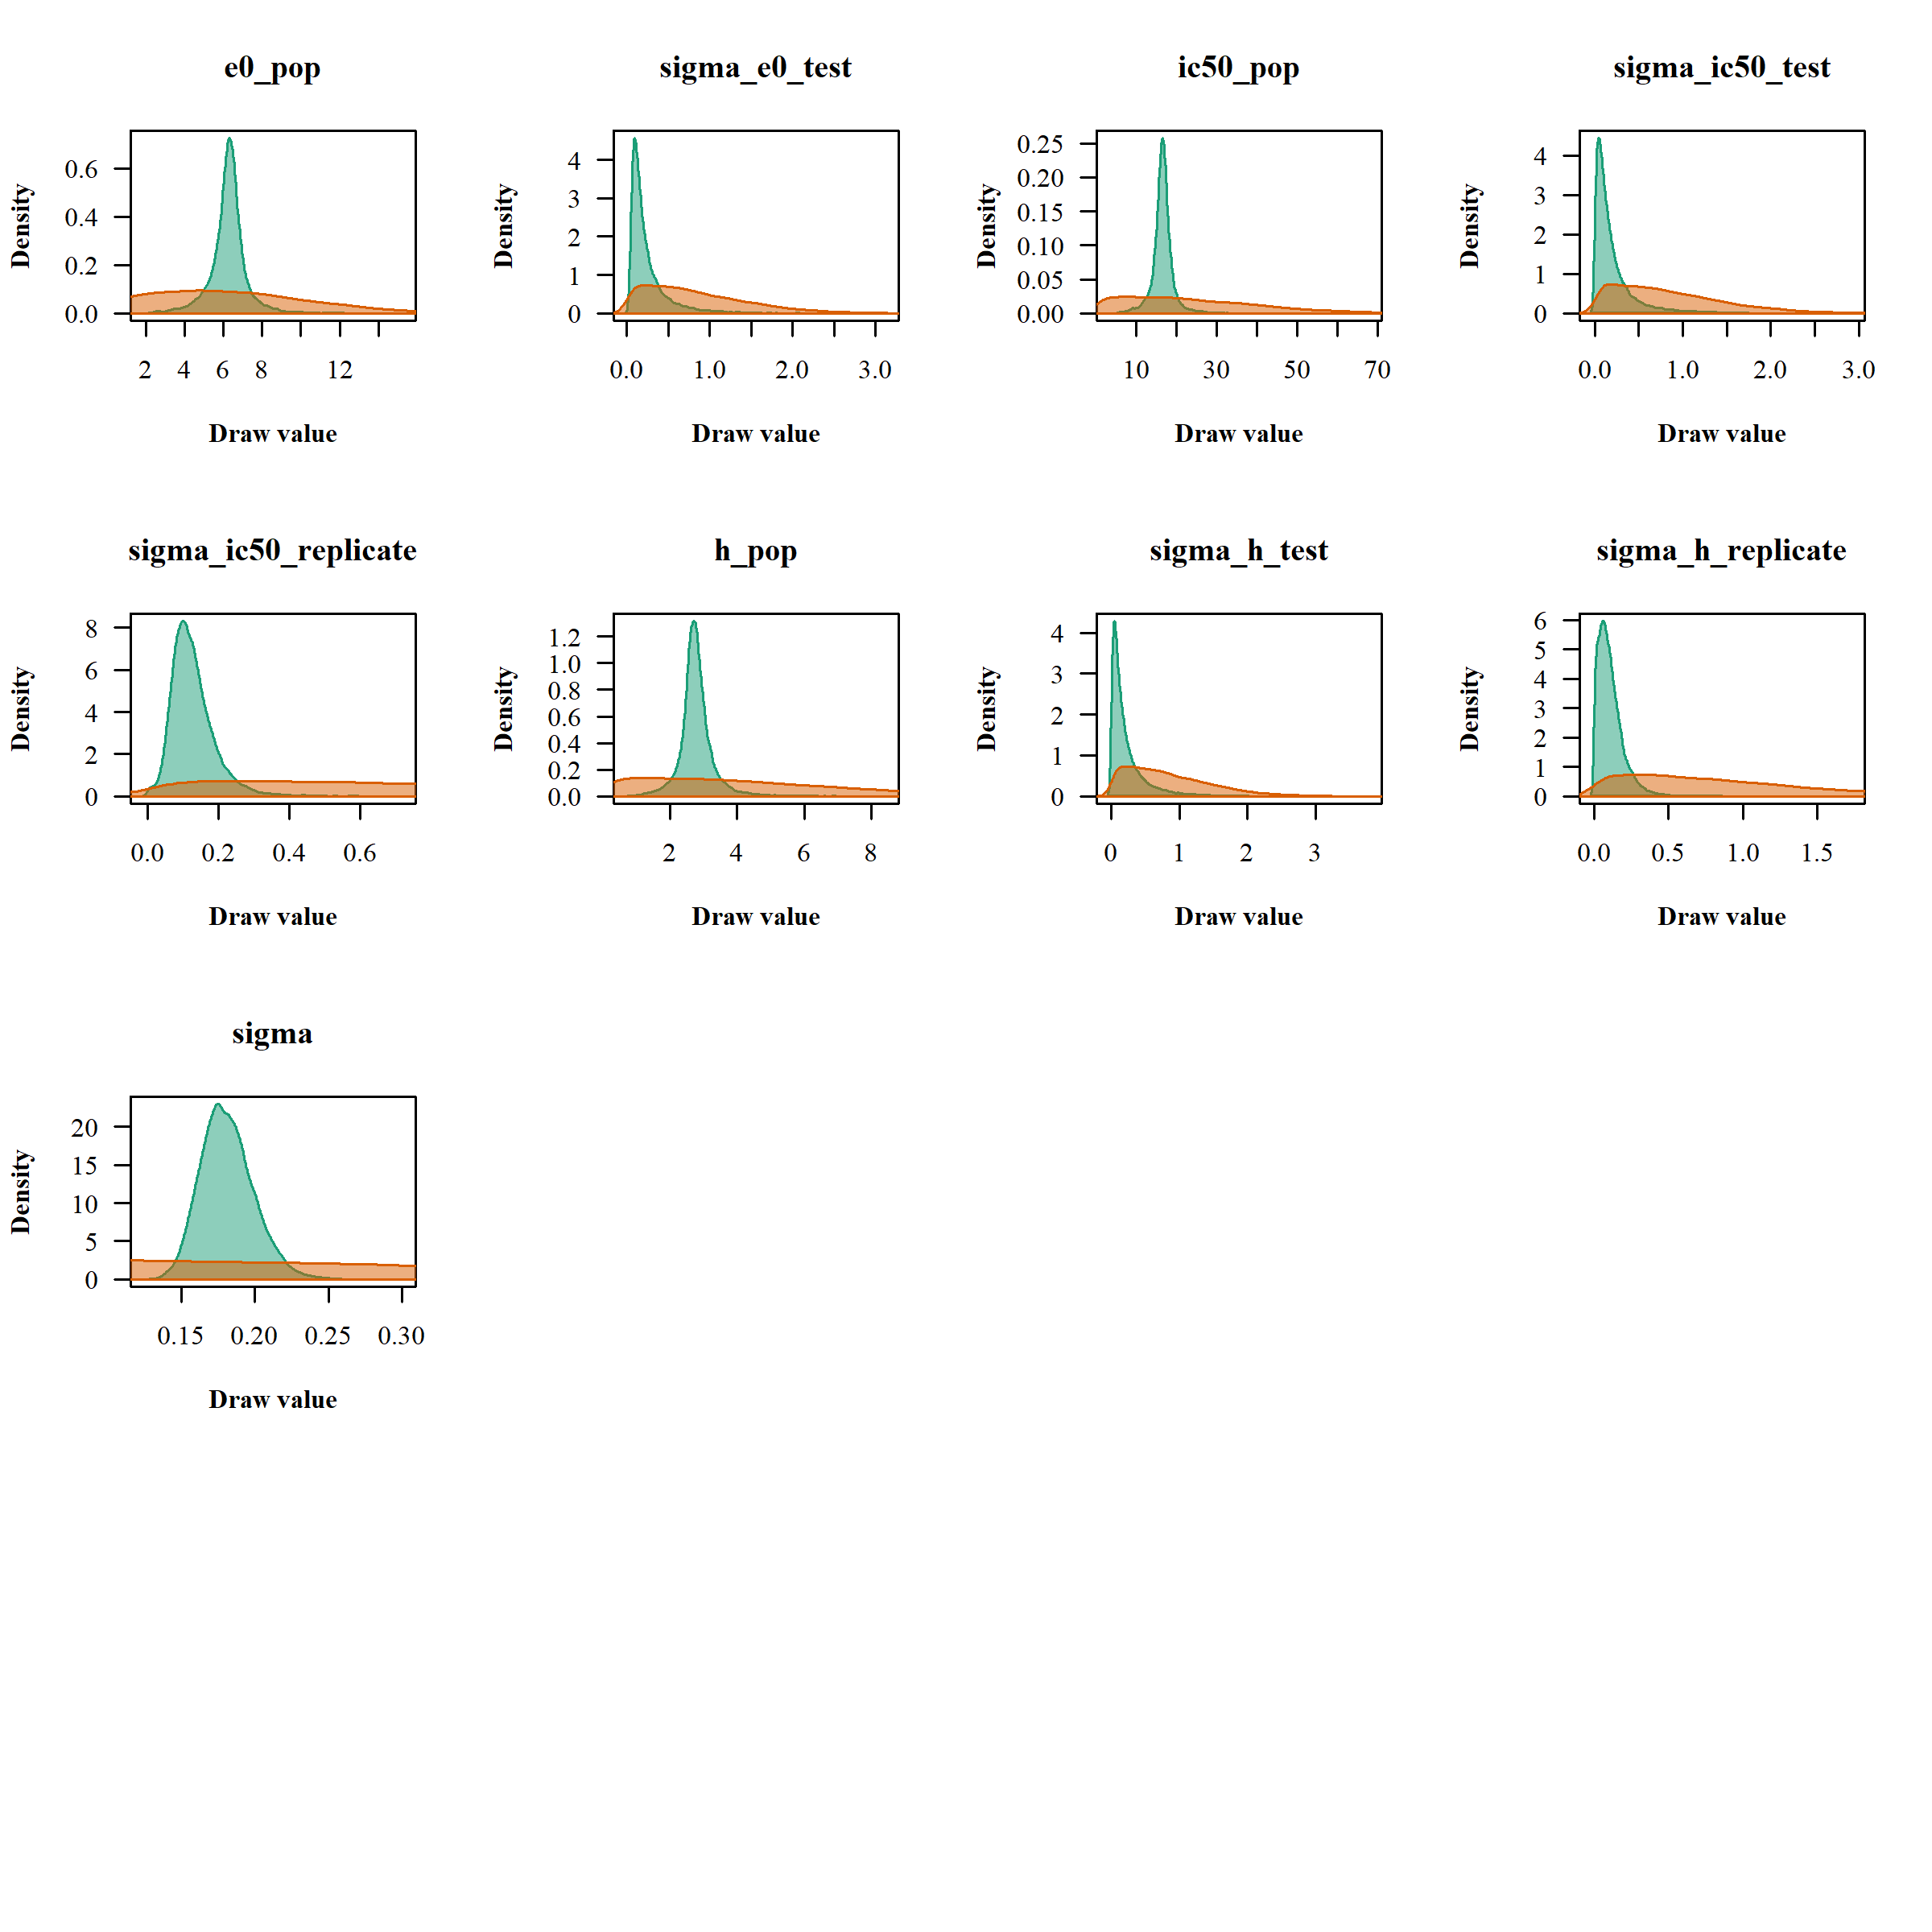


**Figure S3. Comparison between prior distributions (orange) and posterior distributions (green) for the parameters of the Bayesian multilevel model fitted to NF54 data.**


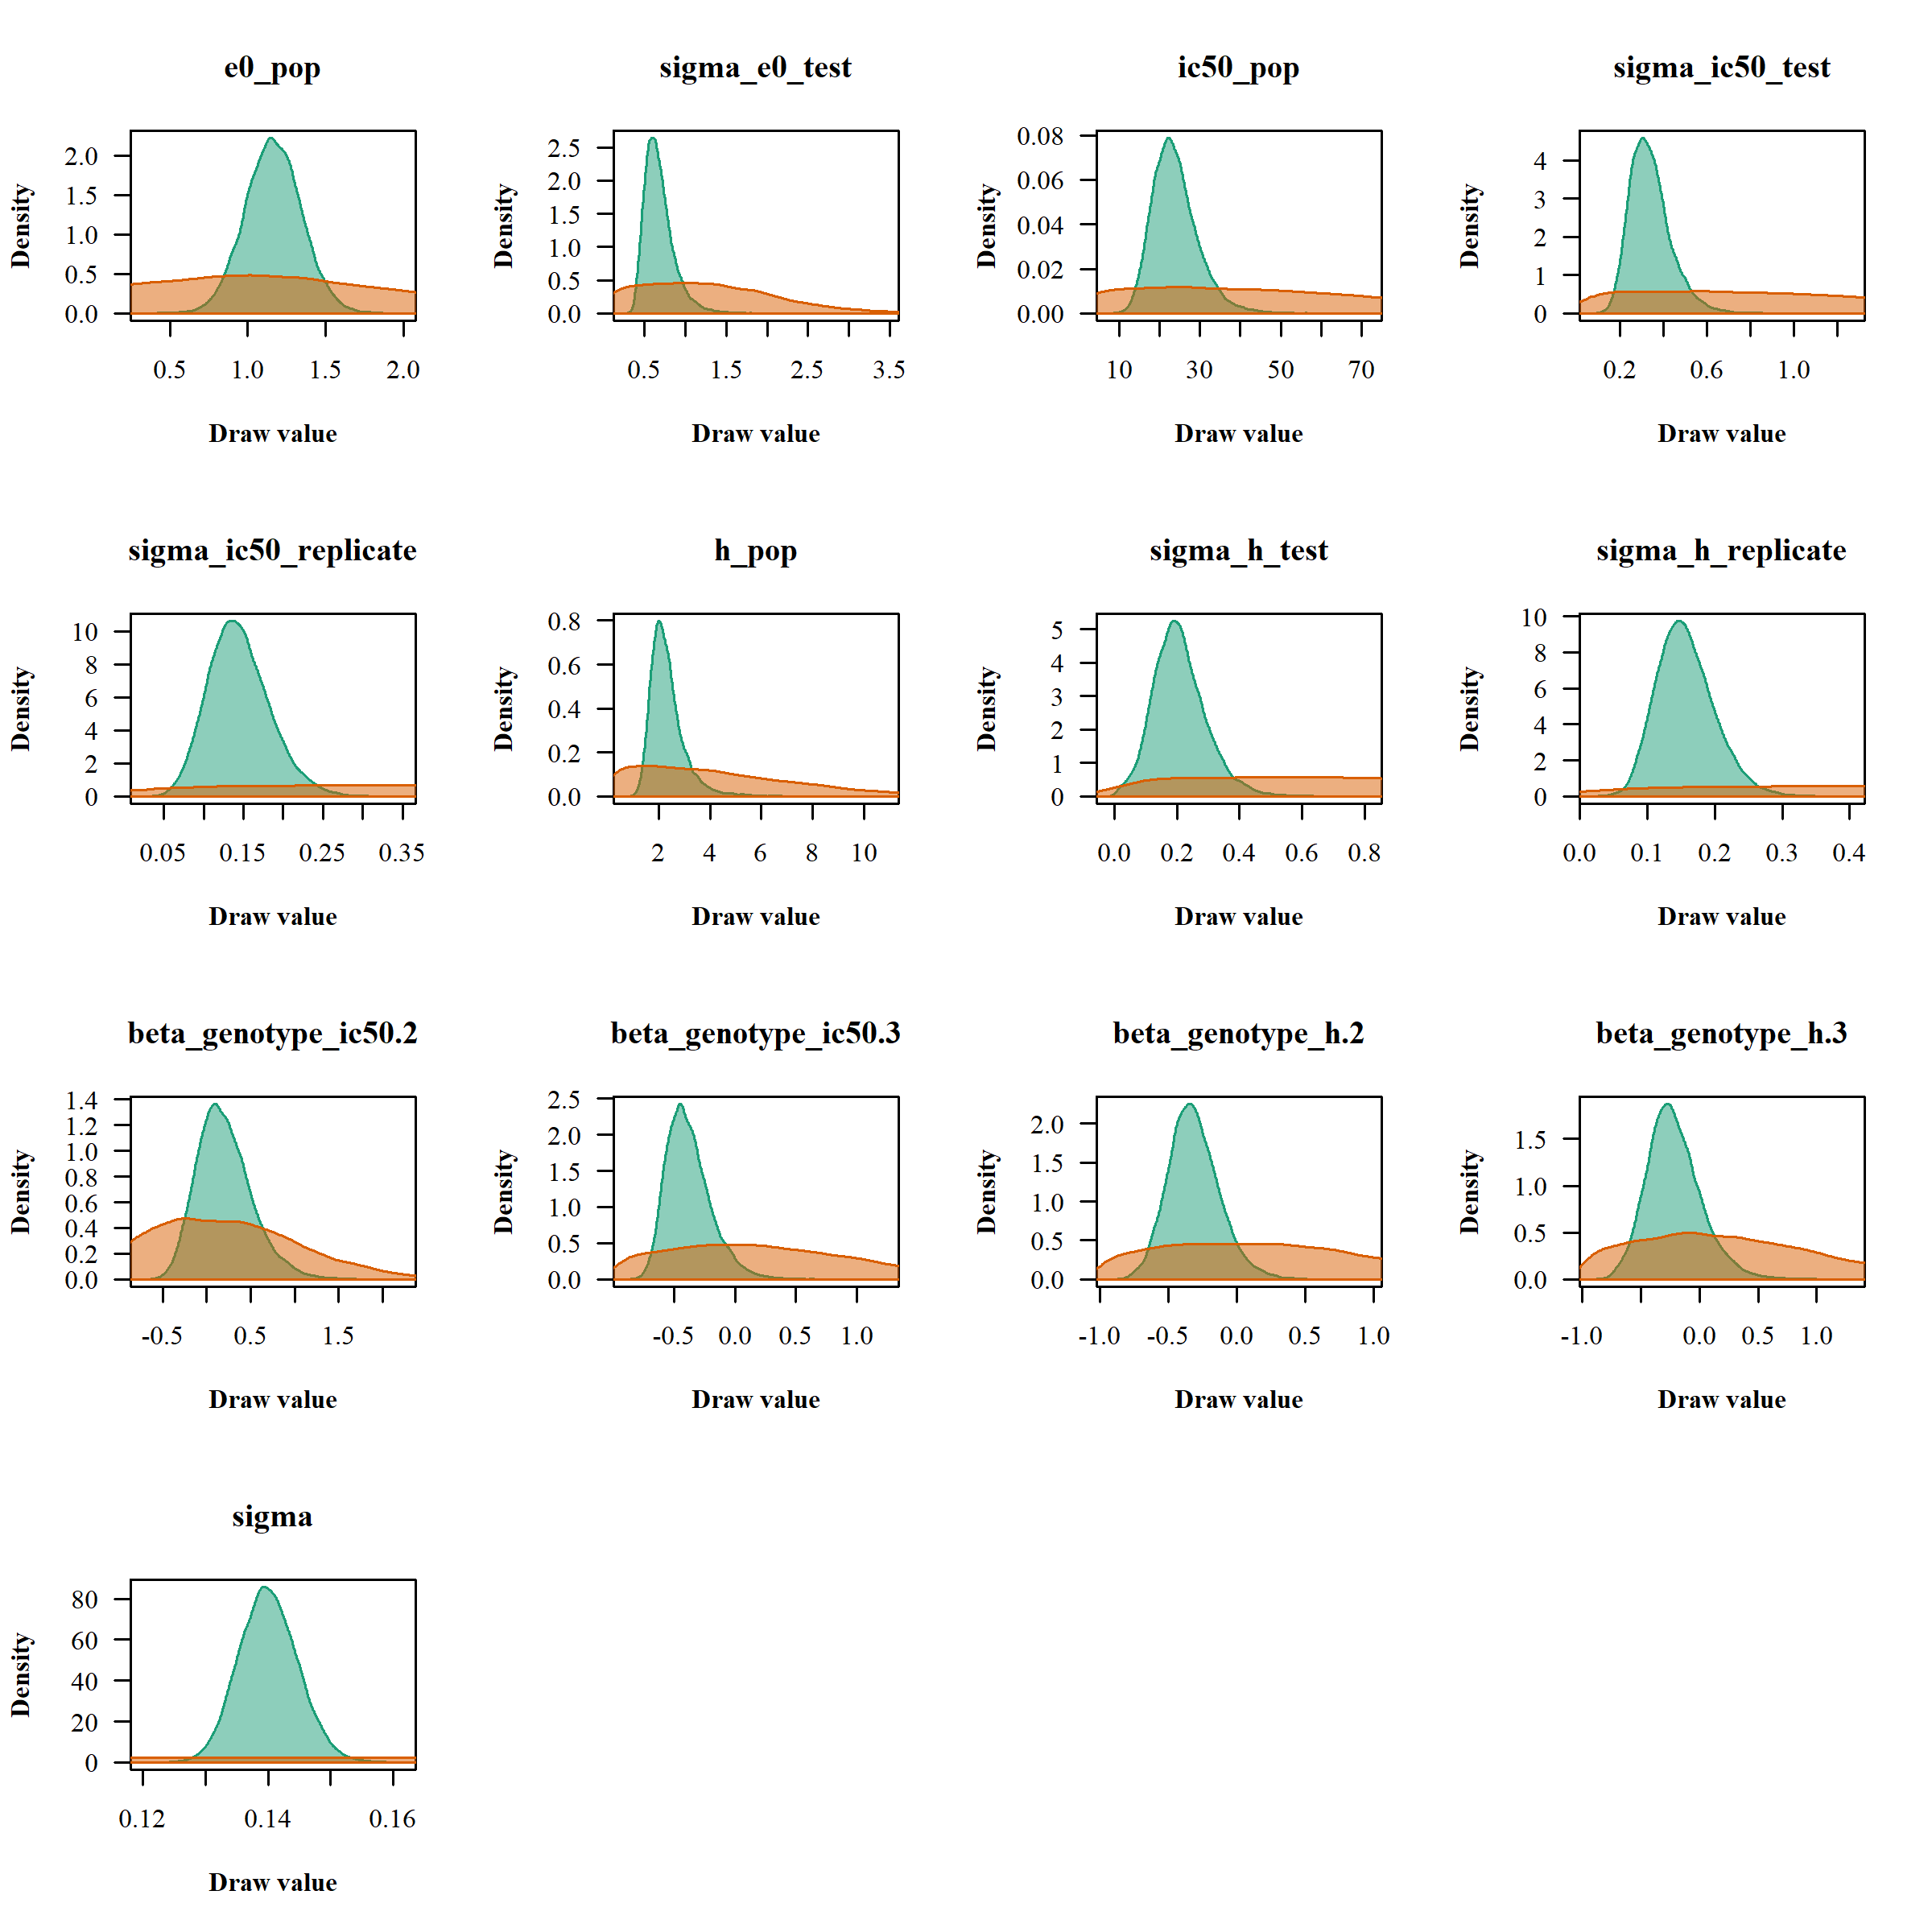


**Figure S4. Comparison between prior distributions (orange) and posterior distributions (green) for the parameters of the Bayesian multilevel model fitted to clinical isolate data.**


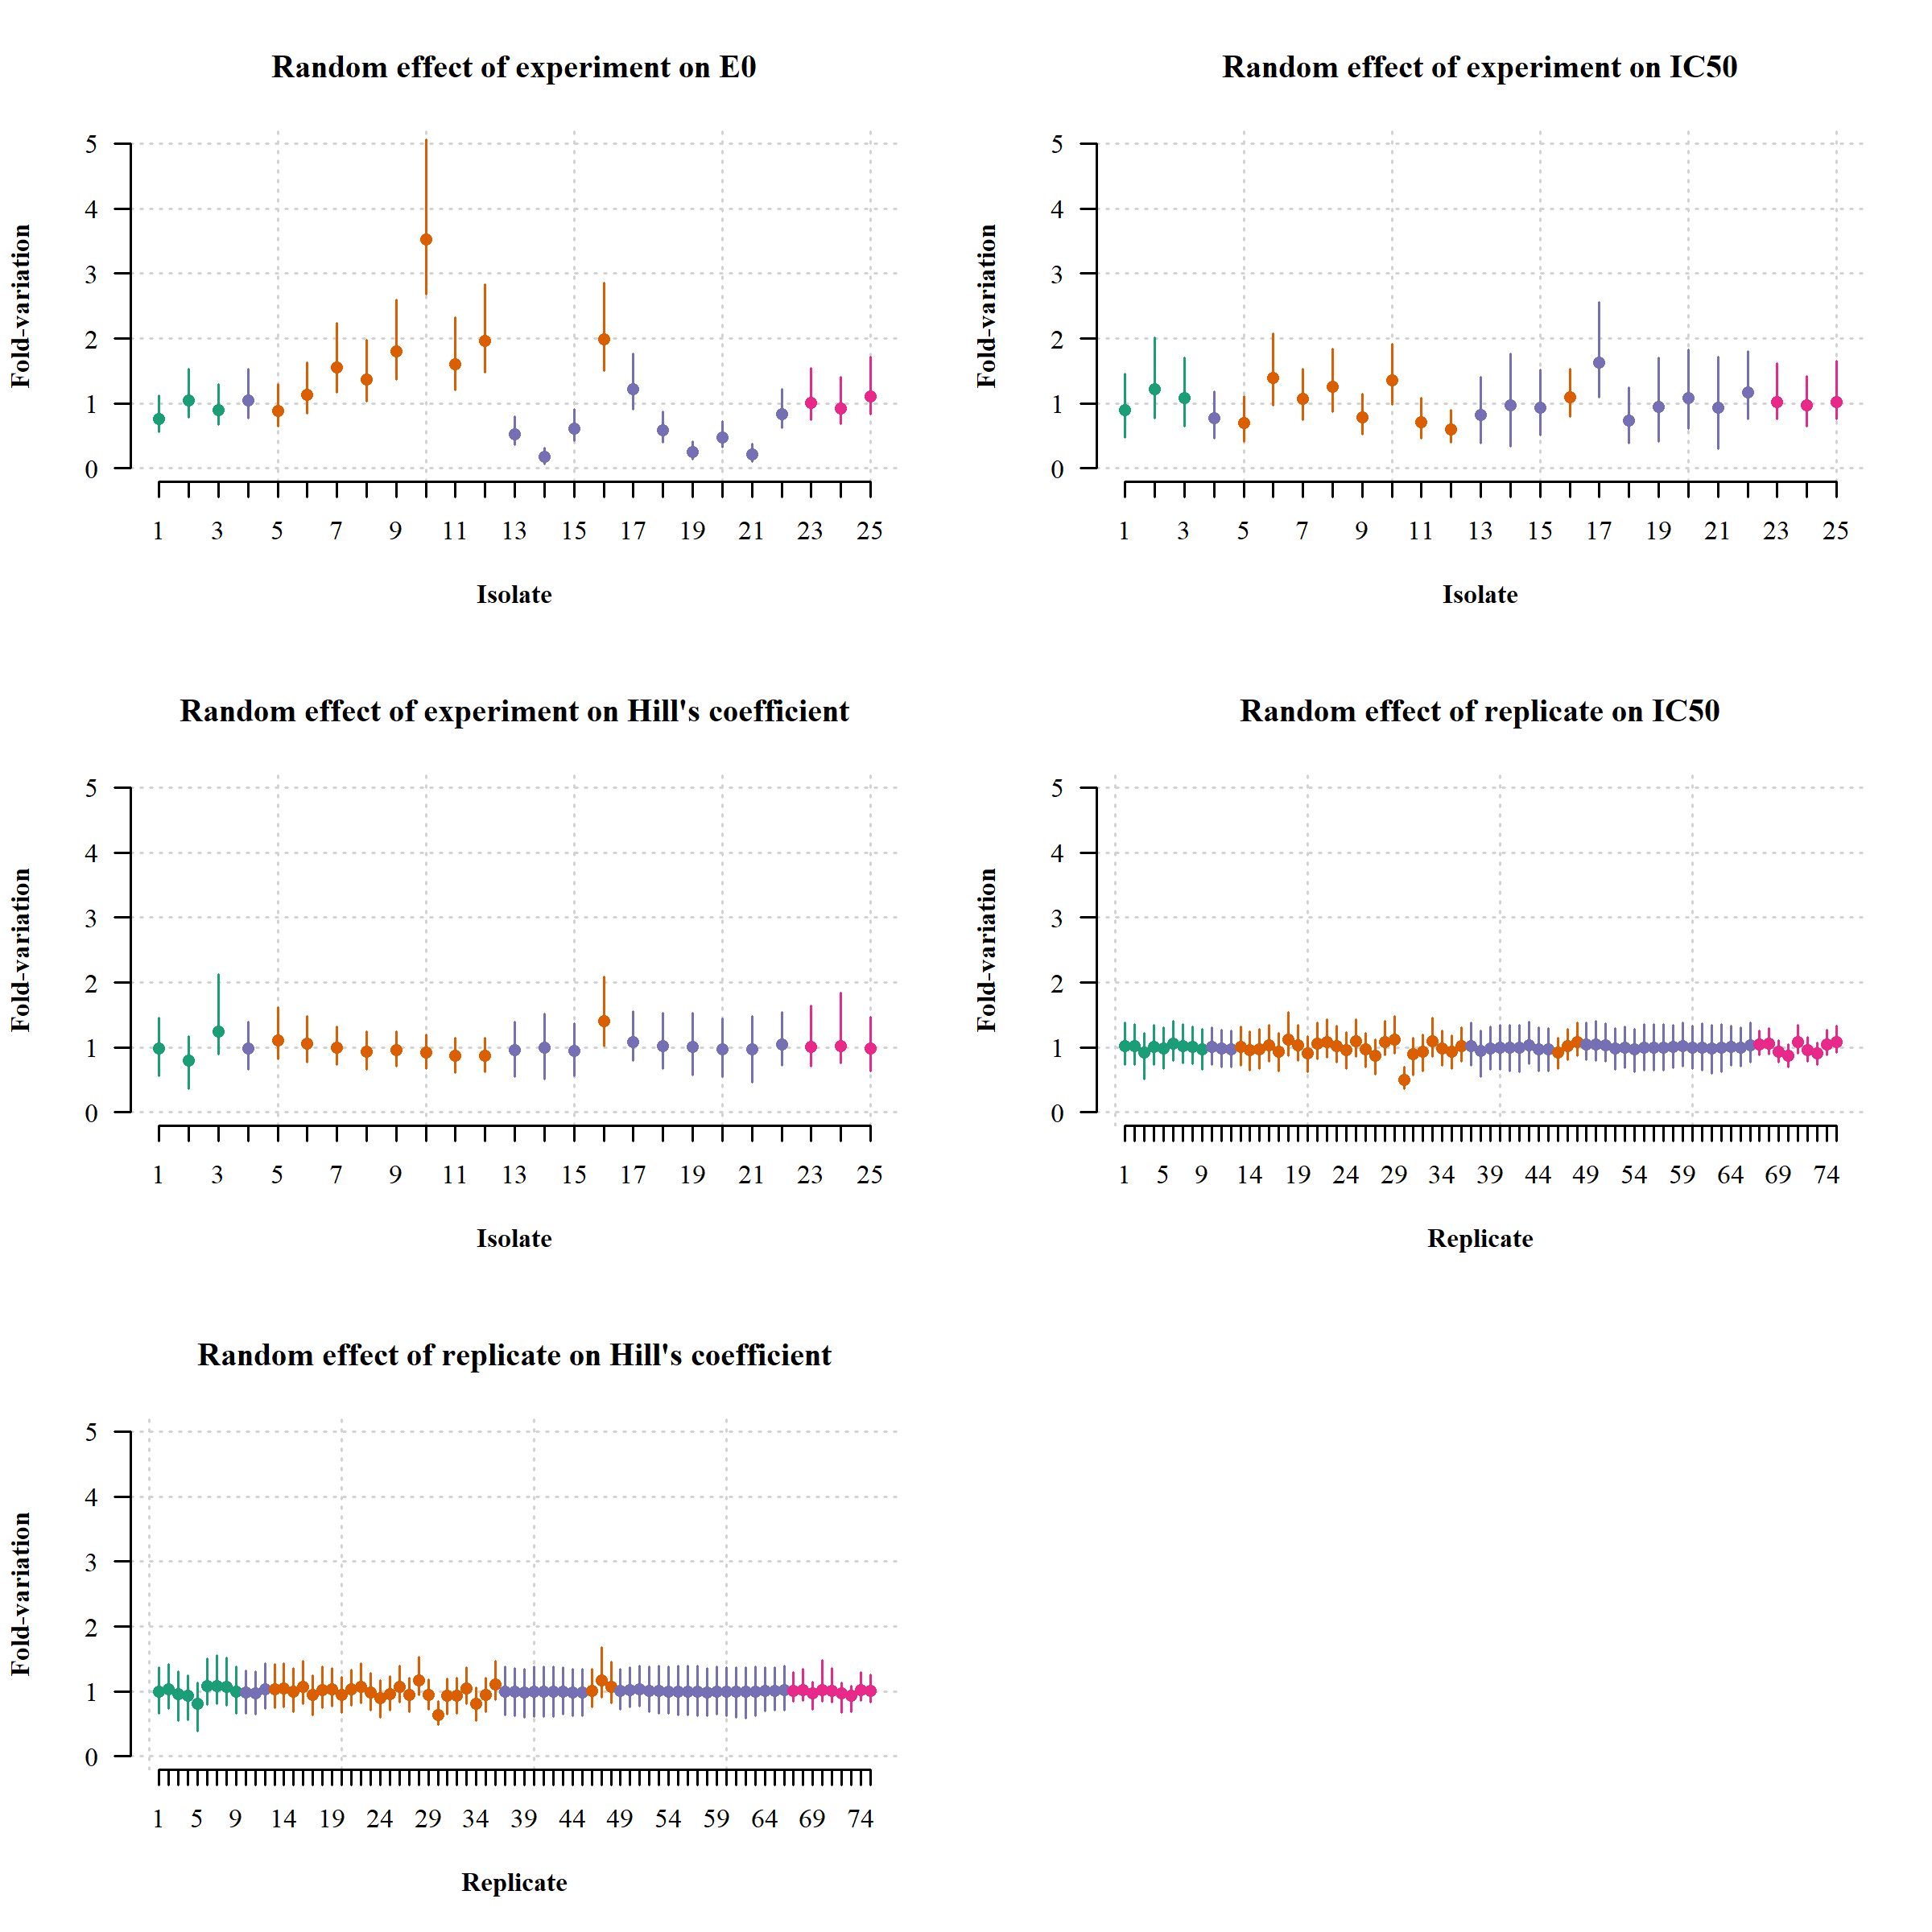


**Figure S5. Random effects of experiment and replicate on Emax model parameters E0, IC50 and Hill’s coefficient.** Green: wild-type, orange: R561H, purple: P441L and pink: NF54.

Table S1. Summary results of the ring survival assay experiments conducted in this study.

| **Test no.** | **Isolate/Strain** | ***Kelch13*** | **Growth rate** | **Mean ring survival at 50 nM (SD)** | **IC50** **nM (95%CrI)** | **IC90 nM (95%CrI)** | **IC99 nM (95%CrI)** | **H (95%CrI)** |
| --- | --- | --- | --- | --- | --- | --- | --- | --- |
| 1 | Isolate #1 | Wild type | 2.0 | 13 (3.6) | 20 (12 to 34) | 59 (28 to 122) | 183 (57 to 706) | 2.1 (1.3 to 4.07) |
| 2 | Isolate #2 | Wild type | 1.8 | 37 (6.6) | 29 (19 to 45) | 109 (61 to 217) | 458 (151 to 1950) | 1.66 (1.06 to 3.01) |
| 3 | Isolate #3 | Wild type | 1.6 | 10 (5.7) | 25 (18 to 35) | 55 (32 to 91) | 130 (55 to 320) | 2.79 (1.82 to 5.34) |
| 4 | Isolate #4 | P441L | 3.5 | 4 (1.6) | 11 (7 to 15) | 40 (23 to 79) | 174 (66 to 607) | 1.64 (1.14 to 2.42) |
| 5 | Isolate #5 | R561H | 1.1 | 11 (4.0) | 19 (12 to 29) | 72 (39 to 131) | 311 (116 to 867) | 1.64 (1.21 to 2.43) |
| 6 | Isolate #6 | R561H | 1.7 | 46 (9.0) | 38 (27 to 53) | 155 (101 to 253) | 720 (321 to 1904) | 1.56 (1.16 to 2.22) |
| 7 | Isolate #7 | R561H | 7.5 | 32 (5.1) | 29 (22 to 39) | 131 (87 to 206) | 664 (321 to 1638) | 1.47 (1.13 to 1.95) |
| 8 | Isolate #8 | R561H | 4.1 | 42 (8.6) | 34 (25 to 47) | 169 (110 to 286) | 958 (431 to 2744) | 1.38 (1.04 to 1.84) |
| 9 | Isolate #9 | R561H | 7.5 | 22 (8.8) | 21 (16 to 29) | 101 (65 to 164) | 549 (262 to 1346) | 1.42 (1.11 to 1.81) |
| 10 | Isolate #10 | R561H | 3.4 | 46 (20.0) | 37 (28 to 47) | 187 (123 to 302) | 1086 (516 to 2822) | 1.36 (1.06 to 1.73) |
| 11 | Isolate #11 | R561H | 6.9 | 24 (6.1) | 19 (14 to 28) | 109 (66 to 196) | 716 (299 to 2211) | 1.28 (0.97 to 1.67) |
| 12 | Isolate #12 | R561H | 2.5 | 22 (8.7) | 16 (12 to 22) | 90 (55 to 156) | 580 (239 to 1637) | 1.29 (1 to 1.68) |
| 13 | Isolate #13 | P441L | 3.8 | 13 (8.7) | 11 (6 to 20) | 45 (20 to 133) | 207 (57 to 1623) | 1.58 (0.92 to 2.56) |
| 14 | Isolate #14 | P441L | 1.9 | 8 (4.1) | 13 (5 to 27) | 51 (16 to 208) | 212 (47 to 3507) | 1.66 (0.83 to 2.84) |
| 15 | Isolate #15 | P441L | 3.1 | 15 (4.5) | 13 (8 to 22) | 53 (25 to 138) | 242 (70 to 1540) | 1.57 (0.96 to 2.48) |
| 16 | Isolate #16 | R561H | 2.0 | 23 (6.3) | 30 (23 to 38) | 86 (62 to 129) | 270 (145 to 613) | 2.09 (1.51 to 2.99) |
| 17 | Isolate #17 | P441L | 3.7 | 25 (3.8) | 23 (16 to 32) | 76 (48 to 121) | 281 (128 to 662) | 1.83 (1.35 to 2.65) |
| 18 | Isolate #18 | P441L | 4.9 | 2 (0.9) | 10 (6 to 18) | 36 (18 to 90) | 147 (45 to 734) | 1.72 (1.09 to 2.76) |
| 19 | Isolate #19 | P441L | 2.3 | 0 (0.7) | 13 (6 to 25) | 49 (19 to 157) | 202 (52 to 1850) | 1.68 (0.94 to 2.84) |
| 20 | Isolate #20 | P441L | 2.4 | 18 (1.7) | 15 (8 to 27) | 61 (29 to 166) | 270 (79 to 2037) | 1.6 (0.93 to 2.63) |
| 21 | Isolate #21 | P441L | 3.7 | 22 (13.0) | 13 (4 to 26) | 51 (15 to 249) | 221 (44 to 5238) | 1.61 (0.76 to 2.75) |
| 22 | Isolate #22 | P441L | 3.0 | 10 (4.3) | 16 (11 to 24) | 58 (32 to 108) | 226 (83 to 718) | 1.75 (1.21 to 2.74) |
| 23 | NF54 | Wild type | 5.4 | 4 (1.1) | 17 (15 to 20) | 38 (29 to 48) | 88 (57 to 128) | 2.81 (2.35 to 3.65) |
| 24 | NF54 | Wild type | 6.3 | 5 (1.9) | 16 (13 to 19) | 34 (22 to 44) | 79 (40 to 120) | 2.85 (2.34 to 4.34) |
| 25 | NF54 | Wild type | 6.7 | 6 (2.1) | 17 (15 to 20) | 39 (31 to 51) | 98 (65 to 146) | 2.65 (2.2 to 3.28) |

Table S2. Pairwise differences in parameter estimates across *kelch13* genotypes in the Bayesian multilevel Emax model fitted to isolate data.

|  | **Median** | **95%CrI** |
| --- | --- | --- |
| IC50 (nM) |  |  |
| R561H *vs* wild type | 4 | -11 to 15 |
| P441L *vs* wild type | -9 | -24 to 1 |
| R561H *vs* P441L | 13 | 4 to 23 |
| H |  |  |
| R561H *vs* wild type | -0.7 | -2.6 to 0.1 |
| P441L *vs* wild type | -0.5 | -2.4 to 0.5 |
| R561H *vs* P441L | -0.2 | -0.9 to 0.4 |
| ED90 (nM) |  |  |
| R561H *vs* wild type | 55 | -12 to 121 |
| P441L *vs* wild type | -12 | -74 to 35 |
| R561H *vs* P441L | 68 | 15 to 130 |
| ED99 (nM) |  |  |
| R561H *vs* wild type | 402 | -79 to 1029 |
| P441L *vs* wild type | 24 | -406 to 385 |
| R561H *vs* P441L | 382 | -56 to 1008 |
